# Supplementary material for: In Patients with Chronic Kidney Disease Advanced Glycation End-Products Receptors Isoforms (sRAGE and esRAGE) Are Associated with Malnutrition
Source: MDPI journal article supplement (doi:10.3390/antiox11071253), 2022-06-25
Supplement: s1 [file s1]

## Supplementary materials

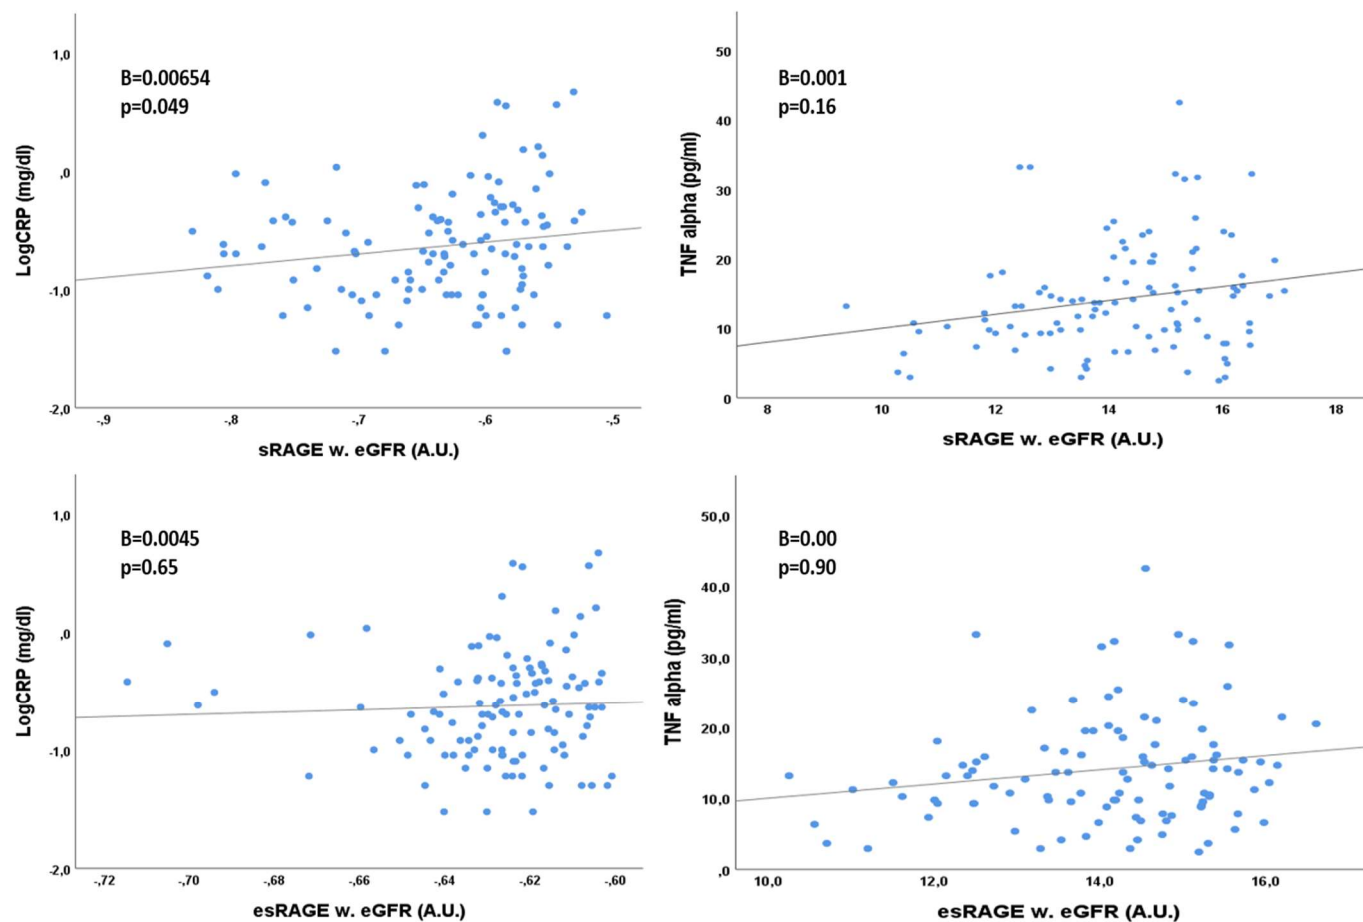

**Figure S1:** linear regression analyses evaluating the association between sRAGE and esRAGE with markers of inflammation weighted for eGFR.

**Note:** CRP: c-reactive protein; TNF $\alpha$ : tumor necrosis factor  $\alpha$ ; sRAGE: sRAGE, soluble receptor for AGE; esRAGE: endogenous secretory receptor for AGE; eGFR: estimated glomerular filtration rate.

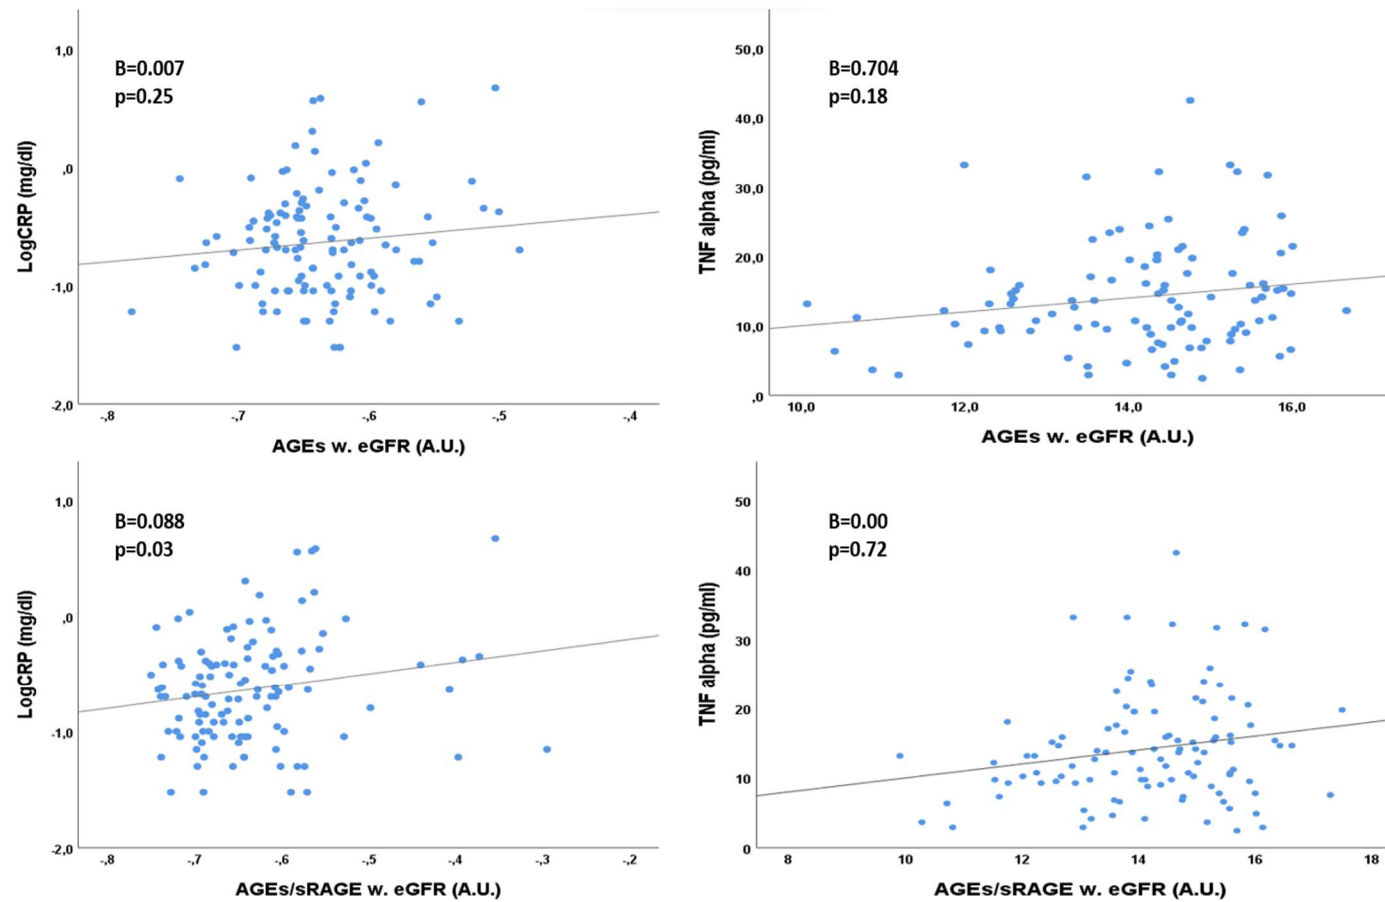

**Figure S2:** linear regression analyses evaluating the association between AGE and AGEs/sRAGE ratio with markers of inflammation, weighted for eGFR

**Note:** CRP: c-reactive protein; TNF $\alpha$ : tumor necrosis factor  $\alpha$ ; AGEs: Advanced Glycation End products; sRAGE, soluble receptor for AGE; eGFR: estimated glomerular filtration rate.

**Table S1:** linear correlation comparison between body composition parameters and AGEs and RAGEs isoforms levels.

| Variables                   | OH                  |              | LTI                 |       | FTI                 |       | BCM                 |       |
|-----------------------------|---------------------|--------------|---------------------|-------|---------------------|-------|---------------------|-------|
|                             | Pearson coefficient | P            | Pearson coefficient | P     | Pearson coefficient | P     | Pearson coefficient | P     |
| AGEs (arbitrary unit)       | 0.179               | 0.095        | -0.052              | 0.630 | -0.114              | 0.292 | -0.042              | 0.695 |
| sRAGE (pg/mL)               | 0.173               | 0.106        | -0.076              | 0.483 | -0.087              | 0.751 | -0.066              | 0.539 |
| esRAGE (pg/ml)              | <b>0.264</b>        | <b>0.013</b> | -0.047              | 0.662 | -0.056              | 0.422 | -0.039              | 0.717 |
| cRAGE (pg/ml)               | 0.107               | 0.319        | -0.081              | 0.452 | -0.034              | 0.751 | -0.072              | 0.504 |
| AGEs/sRAGE (arbitrary unit) | -0.073              | 0.502        | 0.097               | 0.367 | -0.030              | 0.780 | 0.088               | 0.417 |

**Note:** AGEs: Advanced Glycation End products; sRAGE. soluble receptor for AGE; esRAGE: endogenous secretory receptor for AGE; cRAGE: cleaved receptor for AGE; CKD. chronic kidney disease. Data are expressed as mean with standard deviation. P values less than 0.05 are indicated in bold.

**Table S2:** Interaction analysis using logistic regression model, between AGEs, sRAGE and esRAGE, biochemical and metabolic parameters, and malnutrition development.

| Dependent variable              | Control variable | Variables                     | B value | p            |
|---------------------------------|------------------|-------------------------------|---------|--------------|
| <i>Malnutrition development</i> | <i>AGEs</i>      | Age (years)                   | -1.026  | 0.09         |
|                                 |                  | BMI (Kg/m <sup>2</sup> )      | -1.026  | 0.663        |
|                                 |                  | eGFR (ml/min/m <sup>2</sup> ) | -1.026  | 0.548        |
|                                 |                  | Albumin (g/dl)                | -1.065  | 0.384        |
|                                 |                  | CRP (mg/dl)                   | -1.076  | 0.257        |
|                                 |                  | TNF $\alpha$ (pg/ml)          | -1.074  | 0.503        |
|                                 |                  | MCP-1 (pg/ml)                 | -0.901  | 0.633        |
|                                 |                  | Diabetes                      | -1.076  | 0.996        |
|                                 |                  | Sex                           | -1.076  | 0.243        |
|                                 | <i>sRAGE</i>     | Age (years)                   | -1.076  | <b>0.003</b> |
|                                 |                  | BMI (Kg/m <sup>2</sup> )      | -1.076  | 0.107        |
|                                 |                  | eGFR (ml/min/m <sup>2</sup> ) | -1.076  | 0.781        |
|                                 |                  | Albumin (g/dl)                | -1.065  | 0.104        |
|                                 |                  | CRP (mg/dl)                   | -1.076  | <b>0.033</b> |
|                                 |                  | TNF $\alpha$ (pg/ml)          | -1.074  | 0.246        |
|                                 |                  | MCP-1 (pg/ml)                 | -0.901  | 0.206        |
|                                 |                  | Diabetes                      | -1.076  | 0.421        |

|               |                               |        |              |
|---------------|-------------------------------|--------|--------------|
|               | Sex                           | -1.076 | <b>0.017</b> |
|               | Age (years)                   | -1.110 | <b>0.002</b> |
|               | BMI (Kg/m <sup>2</sup> )      | -1.110 | <b>0.032</b> |
|               | eGFR (ml/min/m <sup>2</sup> ) | -1.110 | 0.350        |
| <i>esRAGE</i> | Albumin (g/dl)                | -1.099 | <b>0.031</b> |
|               | CRP (mg/dl)                   | -1.110 | <b>0.023</b> |
|               | TNF $\alpha$ (pg/ml)          | -1.111 | 0.259        |
|               | MCP-1 (pg/ml)                 | -0.901 | 0.259        |
|               | Diabetes                      | -1.110 | 0.383        |
|               | Sex                           | -1.110 | <b>0.004</b> |

**Note:** BMI: Body mass index; eGFR: estimated glomerular filtration rate; nPCR: normalized protein catabolic rate; CRP: c-reactive protein; TNF $\alpha$ : Tumor necrosis factor alpha; IL-6: interleukin 6, MCP-1: Monocyte chemotactic protein-1. The model was built evaluating the interaction between AGEs, sRAGE, esRAGE and variables showed in the table for malnutrition development (malnutrition: dependent variable – Control variable \* variable as independent variable). P values less than 0.05 are indicated in bold.
